# Supplementary material for: German Translation and Linguistic Validation of the LIMB‑Q: A Patient-reported Outcome Measure for Lower Extremity Trauma
Source: PubMed Central journal article supplement — Plast Reconstr Surg Glob Open. 2024 Jul 19;12(7):e6001. doi: 10.1097/GOX.0000000000006001 (PMC11259390; doi:10.1097/gox.0000000000006001), 2024-07-19
Supplement: gox-12-e6001-s001.pdf [file gox-12-e6001-s001.pdf]

SDC 1. Selected examples of reconciled translation changes from the backward translation

| Type of rewording                              | English version                                                | Forward translation into German                                                 | Backward translation                                                  | Reason for change                                                                                                                                | Finalized translation                                                       |
|------------------------------------------------|----------------------------------------------------------------|---------------------------------------------------------------------------------|-----------------------------------------------------------------------|--------------------------------------------------------------------------------------------------------------------------------------------------|-----------------------------------------------------------------------------|
| Meaning and Cultural Accuracy                  | Do moderate exercise (eg, go for a brisk walk)?                | Moderaten Sport zu betreiben (z.B. zügig spazieren zu gehen)?                   | To engage in moderate sports activities (eg, to go for a brisk walk)? | The word "exercise" was translated into "Sport", which connotes sport activities, rather than exercise.                                          | Sich intensiv körperlich zu betätigen (z. B. laufen, radfahren)?            |
| Meaning and Cultural Accuracy                  | Upset?                                                         | Verärgert?                                                                      | Angry?                                                                | Upset can have different meanings in German depending on what is meant.                                                                          | Aufgebracht?                                                                |
| Meaning and Cultural Accuracy                  | I felt self-conscious about my lower limb around other people. | Ich fühlte mich wegen meiner unteren Gliedmaße vor anderen Menschen unsicher.   | I felt insecure in front of other people because of my lower limb.    | Self-consciousness is more about being aware of the limb than insecurity is.                                                                     | Ich fühlte mich wegen meiner unteren Gliedmaße gehemmt vor anderen Menschen |
| From yes/no item to work with response options | Had to reduce the amount of work you do in a day.              | Mussten sie die Menge an Arbeit welche sie an einem Tag durchführen reduzieren? | Did you have to reduce the amount of work you do in a day?            | Should not be a stand-alone question where the answer is yes/no. It should connect to the stem question of "How strongly do you agree that you?" | Die Menge der Arbeit, die Sie an einem Tag erledigen, reduzieren mussten?   |
| Include parts that were missing                | Looked after your lower limb carefully?                        | Sich um ihre untere Gliedmaße gekümmert hat?                                    | Took care of your lower limb?                                         | Missing the idea of "carefully."                                                                                                                 | Sich sorgfältig um Ihre unteren Gliedmaßen gekümmert hat?                   |
